# Supplementary material for: D-DOPA Is a Potent, Orally Bioavailable, Allosteric Inhibitor of Glutamate Carboxypeptidase II
Source: MDPI journal article supplement (doi:10.3390/pharmaceutics14102018), 2022-09-23
Supplement: s1 [file s1]

# Supporting Information

## D-DOPA Is a Potent, Orally Bioavailable, Allosteric Inhibitor of Glutamate Carboxypeptidase II

Sadakatali S. Gori <sup>1,2</sup>, Ajit G. Thomas <sup>2</sup>, Arindom Pal <sup>1,2</sup>, Robyn Wiseman <sup>2,3</sup>, Dana V. Ferraris <sup>2</sup>, Runduo Gao <sup>1,2</sup>, Ying Wu <sup>2</sup>, Jesse Alt <sup>2</sup>, Takashi Tsukamoto <sup>1,2,3</sup>, Barbara S. Slusher <sup>1,2,3,4,5,6,7,\*</sup> and Rana Rais <sup>1,2,3,\*</sup>

<sup>1</sup> Department of Neurology, Johns Hopkins School of Medicine, Baltimore, MD 21205, USA

<sup>2</sup> Johns Hopkins Drug Discovery, Johns Hopkins School of Medicine, Baltimore, MD 21205, USA

<sup>3</sup> Department of Pharmacology and Molecular Sciences, Johns Hopkins School of Medicine, Baltimore, MD 21205, USA

<sup>4</sup> Departments of Psychiatry and Behavioral Sciences, Johns Hopkins School of Medicine, Baltimore, MD 21205, USA

<sup>5</sup> Department of Oncology, Johns Hopkins School of Medicine, Baltimore, MD 21205, USA

<sup>6</sup> Department of Neuroscience, Johns Hopkins School of Medicine, Baltimore, MD 21205, USA

<sup>7</sup> Department of Medicine, Johns Hopkins School of Medicine, Baltimore, MD 21205, USA

\* Correspondence: [bslusher@jhmi.edu](mailto:bslusher@jhmi.edu) (B.S.S.); [rrais2@jhmi.edu](mailto:rrais2@jhmi.edu) (R.R.)

## **Table of Contents**

1. Metabolite Identification in D-/L-DOPA Spiked Brain Homogenate – Page 3
2. Suitability of LC-MS Method Used for D-DOPA Analyses – Page 4

### Metabolite Identification in D-/L-DOPA Spiked Brain Homogenate

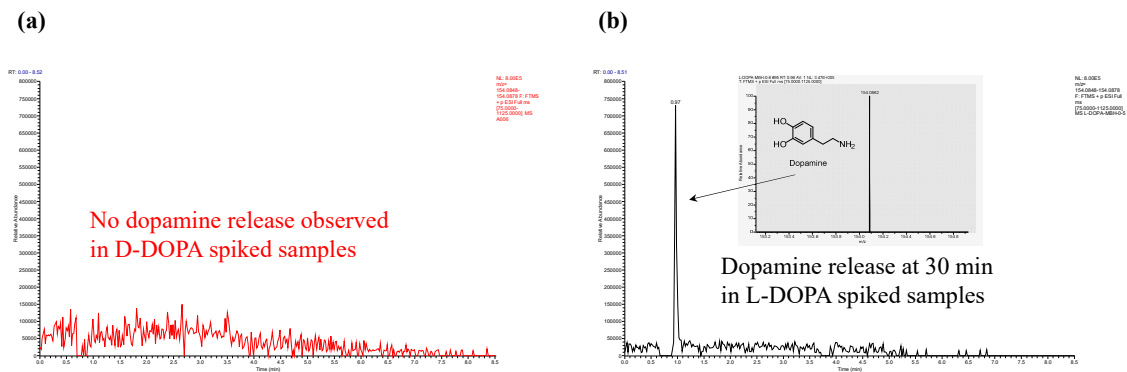

**Figure S1. Dopamine release from (a) D-DOPA (red plot) and (b) L-DOPA (black plot) spiked brain homogenate at 30 min post-spike.** Dopamine is observed in L-DOPA spiked brain homogenate and is not observed in D-DOPA spiked brain homogenate.

### Accuracy and Precision of LC-MS Method Used for D-DOPA Analyses in Plasma

**Table S1-A.** Statistical evaluation of calculated concentrations of derivatized D-DOPA obtained from the calibration curves (n=3) prepared in mouse plasma and brain.

| Nominal Concentration (nmol/mL) | Plasma       |                   | Brain        |                   |
|---------------------------------|--------------|-------------------|--------------|-------------------|
|                                 | Accuracy (%) | Precision (% RSD) | Accuracy (%) | Precision (% RSD) |
| 0.03                            | 112          | 1.11              | -            | -                 |
| 0.1                             | 97.1         | 5.05              | 115          | 0.848             |
| 0.3                             | 93.7         | 2.40              | 95.8         | 0.750             |
| 1                               | 96.5         | 1.05              | 93.9         | 1.38              |
| 3                               | 100          | 0.680             | 93.6         | 0.776             |
| 10                              | 100          | 0.966             | 101          | 1.14              |
| 30                              | 97.4         | 3.89              | 101          | 1.10              |
| 100                             | 98.8         | 2.58              | 99.9         | 3.34              |

**Table S1-B.** Inter and intra-day precision and accuracy for derivatized D-DOPA in mouse plasma and brain determined by analyzing replicates (n=3/day) of spiked samples at 4 different concentration levels over 2 subsequent days. Statistics for inter-day evaluation are generated from n=6 samples.

| Nominal Concentration (nmol/mL) | Plasma         |                   |                |                   | Brain          |                   |                |                   |
|---------------------------------|----------------|-------------------|----------------|-------------------|----------------|-------------------|----------------|-------------------|
|                                 | Intraday (n=3) |                   | Interday (n=6) |                   | Intraday (n=3) |                   | Interday (n=6) |                   |
|                                 | Accuracy (%)   | Precision (% RSD) |
| 0.05                            | 108            | 0.831             | 108            | 0.831             | -              | -                 | -              | -                 |
| 0.5                             | 94.0           | 2.75              | 94.0           | 2.75              | 95.5           | 2.48              | 95.0           | 2.14              |
| 5                               | 100            | 3.88              | 100            | 3.88              | 95.5           | 1.82              | 97.4           | 2.52              |
| 50                              | 101            | 6.09              | 101            | 6.09              | 101            | 0.586             | 101            | 1.06              |

**Table S1-C.** Stability of derivatized D-DOPA in mouse plasma and brain when stored at benchtop (18 h, room temperature) and autosampler (18 h at 4°C).

| Nominal Concentration (nmol/mL) | Plasma                 |                           | Brain                  |                           |
|---------------------------------|------------------------|---------------------------|------------------------|---------------------------|
|                                 | Benchtop Stability (%) | Autosampler Stability (%) | Benchtop Stability (%) | Autosampler Stability (%) |
| 0.05                            | 101 ± 0.588            | 96.0 ± 3.17               | -                      | -                         |
| 0.5                             | 101 ± 1.03             | 103 ± 1.59                | 97.7 ± 0.0152          | 98.4 ± 0.0115             |
| 5                               | 100 ± 1.54             | 101 ± 2.22                | 102 ± 0.00415          | 102 ± 0.00557             |
| 50                              | 98.9 ± 1.30            | 102 ± 3.17                | 99.6 ± 0.0126          | 99.4 ± 0.00743            |
